## THE ANESTHESIOLOGIST'S BOOKSHELF

HUBERTA M. LIVINGSTONE, M.D., *Editor*

**A Pharmacologic Approach to the Study of the Mind.** Edited by ROBERT M. FEATHERSTONE, PH.D., Professor and Chairman of the Department of Pharmacology, University of California School of Medicine, San Francisco and ALEXANDER SIMON, M.D., Professor and Chairman of the Department of Psychiatry, University of California School of Medicine, San Francisco, California. Cloth, \$10.75. Pp. 399, with illustrations. Charles C Thomas, Publisher, Springfield, Illinois, 1959.

This is an exciting report of a three-day symposium held at the University of California School of Medicine. There were 41 speakers and as many presentations. The theme is both a chemical and pharmacologic study of thinking and of abnormal behavior. The subject matter includes well prepared discussions of psychochemistry and psychopharmacology, of the philosophy of investigation, especially non-empiric approaches; of problems in research design, and of the tranquilizers and excitants, including hallucinogenic drugs. The presentation of Aldous Huxley is especially edifying in terms of concepts.

This volume is well edited. It suffers from the usual difficulties of reporting a symposium, namely, the overlap of material, which is particularly pronounced in discussions on hallucinogenic drugs. The readability is good. All papers have good reference lists. Anesthesiologists could profitably read most of these papers to broaden their knowledge and to stimulate a fresh approach in their own field.

VINCENT J. COLLINS, M.D.

### **Clinical Pharmacology and Therapeutics.**

Official publication of the American Therapeutic Society. Vol. 1. No. 1. January-February, 1960. WALTER MODELL, M.D., Editor, 1300 York Avenue, New York 21, N. Y. Published bimonthly. Subscription rates: U. S. and its Possessions \$12.50 (students \$6.25); Canada, Latin-America and

Spain \$13.00 (students \$6.75); other countries \$13.50 (students \$7.25). Single copies \$2.50. The C. V. Mosby Co., 3207 Washington Blvd., St. Louis 3, Missouri.

This new scientific publication is a welcome addition to the medical literature. Its distinguished editorial board of 27 members includes three from England, one from Sweden and the remainder from the United States. This journal is devoted to the publication of original articles and reviews dealing with the effects of drugs in man, which previously were never readily accessible in a single journal. The plan is to not publish articles on animal experimentation, *per se*; such reports being limited to an integral part of, or basic to, studies dealing primarily with the effects of drugs in man.

It is now widely recognized that there are many problems concerning the pharmacologic and therapeutic evaluation of the large number of new drugs regularly being marketed, promoted, and introduced into medical practice. An up-to-date collection of basic studies on the effects of these drugs in man is of great importance.

This first edition contains 136 pages devoted to an editorial, a commentary, a symposium, introducing the study of drugs in man, five original articles, five review articles, and one book review. The articles are timely and replete with references. Advertisements appear inside the front and back covers. This journal has an excellent format, paper and printing are of fine quality, and the illustrations are adequate.

This journal is highly recommended to the medical profession, both academic and practicing.

H. M. LIVINGSTONE, M.D.

**Principles and Practices of Obstetric Anaesthesia.** By J. SELWYN CRAWFORD, M.B., CH.B., D.A. (England), F.F.A.R.C.S., Anaesthesia Service, The Presbyterian Hospital,
